# Supplementary material for: Characteristics and Risk Factors Associated with SARS-CoV-2 Pneumonias in Hospitalized Pediatric Patients: A Pilot Study
Source: MDPI journal article supplement (doi:10.3390/children10101703), 2023-10-19
Supplement: s1 [file s1]

**Table S1: Laboratory results comparing patients who required any type of respiratory support with those who did not, and patients who required NIV and CMV with those who did not.** The results are expressed as median and interquartile range [25-75].

| Parameter                                      | Patients who required any type of respiratory support (n=37) | Patients who DID NOT required respiratory support (n=7) | p-value      | Patients who required NIV (n=11) | Patients who DID NOT required NIV (n=33) | p-value      | Patients who required CMV (n=4) | Patients who DID NOT required CMV (n=40) | p-value      |
|------------------------------------------------|--------------------------------------------------------------|---------------------------------------------------------|--------------|----------------------------------|------------------------------------------|--------------|---------------------------------|------------------------------------------|--------------|
| Hemoglobin; minimum (g/dL)                     | 12.4 [10.8 – 14.6]                                           | <b>11.8 [10.8 – 13]</b>                                 | 0.572        | <b>10.6 [9.4 – 12.2]</b>         | 13 [11.5 – 14.6]                         | <b>0.003</b> | <b>9.3 [9 – 10.3]</b>           | 12.7 [11.4 – 14.5]                       | <b>0.001</b> |
| Platelets; minimum (x10 <sup>3</sup> /μl)      | 181 [163 – 226]                                              | 147 [121 – 321]                                         | 0.961        | 182 [168 – 227]                  | 181 [135 – 234]                          | 0.808        | 182 [92 – 258]                  | 179 [140 – 226]                          | 0.750        |
| Leucocyte count; maximum (/mm <sup>3</sup> )   | 9200 [6500 – 11400]                                          | 5600 [3800 – 8200]                                      | <b>0.021</b> | 10900 [7400 – 13000]             | 7700 [5500 – 10200]                      | 0.118        | 11000 [4400 – 17000]            | 8050 [5800 – 10800]                      | 0.547        |
| Lymphocyte count; minimum (/mm <sup>3</sup> )  | <b>800 [550 – 1400]</b>                                      | 1600 [600 – 2000]                                       | <b>0.037</b> | <b>600 [400 – 900]</b>           | <b>1100 [700 – 1600]</b>                 | <b>0.005</b> | <b>700 [150 – 1400]</b>         | <b>850 [620 – 1500]</b>                  | 0.188        |
| Neutrophile count; maximum (/mm <sup>3</sup> ) | <b>6100 [3900 – 8000]</b>                                    | 3000 [2200 – 5800]                                      | <b>0.003</b> | <b>7800 [5200 – 8600]</b>        | 4800 [3050 – 6900]                       | 0.110        | <b>6500 [2500 – 10100]</b>      | <b>5700 [3200 – 7500]</b>                | 0.841        |
| C-reactive protein; maximum (mg/L)             | <b>49 [16 – 112]</b>                                         | <b>17 [2.8 – 69]</b>                                    | <b>0.046</b> | <b>63 [31 – 178]</b>             | <b>35 [13 – 71]</b>                      | 0.192        | <b>46 [16 – 148]</b>            | <b>39 [14 – 94]</b>                      | 0.988        |
| Procalcitonin; maximum (ng/mL)                 | 0.18 [0.06 – 0.57]                                           | 0.12 [0.05 – 0.62]                                      | 0.124        | <b>0.52 [0.31 – 1.64]</b>        | 0.09 [0.06 – 0.38]                       | <b>0.008</b> | <b>0.72 [0.36 – 1.26]</b>       | 0.11 [0.06- 0.54]                        | 0.731        |
| Ferritin; maximum (ug/L)                       | <b>400 [190 – 1300]</b>                                      | <b>263 [136 – 310]</b>                                  | 0.258        | <b>819 [385 – 1952]</b>          | <b>268 [189 – 742]</b>                   | 0.112        | <b>1990 [166 – 9400]</b>        | <b>310 [190 – 1150]</b>                  | <b>0.002</b> |
| LDH; maximum (IU/L)                            | <b>840 [720 – 1090]</b>                                      | <b>613 [589 – 949]</b>                                  | 0.074        | <b>1086 [805 – 2123]</b>         | <b>791 [589 – 1029]</b>                  | <b>0.006</b> | <b>1960 [1050 – 3100]</b>       | <b>832 [612 – 1070]</b>                  | 0.132        |
| IL-6; maximum (pg/mL)                          | <b>32 [8.5 – 91]</b>                                         | <b>20 [3 – 40]</b>                                      | 0.191        | <b>43 [25 – 112]</b>             | <b>11 [6 – 85]</b>                       | 0.379        | <b>71 [4.6 – 123]</b>           | <b>28 [9 – 94]</b>                       | 0.458        |
| PT; minimum (%)                                | 76 [71 – 91]                                                 | 85 [76 – 98]                                            | 0.351        | 75 [69 – 82]                     | 81 [72 – 93]                             | 0.130        | 79 [74 – 94]                    | 79 [71 – 92]                             | 0.700        |
| aPTT; maximum (seconds)                        | 26 [23 – 29]                                                 | 28 [25 – 29]                                            | 0.494        | 25 [22 – 31]                     | 26 [24 – 28]                             | 0.830        | 28 [18 – 32]                    | 26 [24 – 29]                             | 0.945        |
| INR; maximum                                   | 1.13 [1.04 – 1.21]                                           | 1.11 [1.01 – 1.19]                                      | 0.443        | 1.18 [1.08 – 1.29]               | 1.11 [1.03 – 1.15]                       | 0.113        | 1.10 [0.9 – 1.20]               | 1.13 [1.05 – 1.23]                       | 0.381        |
| Fibrinogen; maximum (g/L)                      | <b>5.3 [4.6 – 6.5]</b>                                       | <b>4.5 [3.9 – 6]</b>                                    | 0.605        | <b>5.1 [4.4 – 6.8]</b>           | <b>4.9 [4.5 – 6.1]</b>                   | 0.969        | <b>4.3 [3.7 – 5.5]</b>          | <b>5 [4.6 – 6.7]</b>                     | 0.069        |
| D-dimer;                                       | <b>1 [0.6 – 2.1]</b>                                         | 0.42 [0.39 – 1.92]                                      | 0.162        | <b>1.2 [0.8 – 2.4]</b>           | <b>0.75 [0.42 – 1.8]</b>                 | 0.687        | <b>2.1 [1.1 – 3.4]</b>          | <b>0.89 [0.58 – 1.86]</b>                | 0.750        |

|                                             |                       |                        |              |                        |                       |              |                        |                       |              |
|---------------------------------------------|-----------------------|------------------------|--------------|------------------------|-----------------------|--------------|------------------------|-----------------------|--------------|
| maximum (mg/L)                              |                       |                        |              |                        |                       |              |                        |                       |              |
| Troponin;<br>maximum (ng/mL)                | 0.002 [0.001 – 0.007] | 0.002 [0.0002 – 0.011] | 0.234        | 0.007 [0.005 – 0.085]  | 0.001 [0.001 – 0.003] | <b>0.041</b> | 0.007 [0.001 – 0.02]   | 0.002 [0.001 – 0.006] | <b>0.003</b> |
| NT-ProBNP;<br>maximum (ng/L)                | 81 [16 – 196]         | 20 [14 – 90]           | 0.731        | <b>160 [131 – 262]</b> | 20 [15 – 81]          | 0.101        | <b>162 [135 – 196]</b> | 36 [15 – 87]          | 0.494        |
| Creatin kinase;<br>maximum (UI/L)           | 67 [45 – 161]         | 71 [13 – 180]          | 0.345        | 53 [25 -215]           | 75 [46 – 130]         | 0.238        | 140 [24 – 450]         | 67 [45 – 134]         | <b>0.001</b> |
| Sodium;<br>average (mmol/L)                 | 140 [136 -143]        | 138 [137 – 141]        | 0.164        | 141 [139 – 146]        | 138 [136 – 141]       | 0.052        | 141 [139 – 148]        | 139 [136 – 141]       | 0.289        |
| Potassium;<br>average (mmol/L)              | 4 [3.8 – 4.2]         | 4.3 [3.6 – 4.5]        | 0.652        | 4 [3.6 – 4.2]          | 4.1 [3.8 – 4.3]       | 0.332        | 3.8 [3.5 – 4.6]        | 4.1 [3.8 – 4.3]       | 0.844        |
| Ionic Calcium;<br>average (mmol/L)          | 1.22 [1.15 – 1.26]    | 1.20 [1.17 – 1.26]     | 0.984        | 1.23 [1.14 – 1.29]     | 1.21 [1.18 – 1.25]    | 0.533        | 1.29 [1.14 – 1.32]     | 1.21 [1.15 – 1.25]    | 0.127        |
| Phosphate;<br>average (mg/dL)               | 3.7 [3.2 – 4.3]       | 3.7 [3.1 – 4]          | 0.915        | 3.7 [2.5 – 4.9]        | 3.7 [3.1 – 4.2]       | 0.776        | 5 [3.8 – 5.2]          | 3.7 [3.1 – 4.3]       | 0.456        |
| Magnesium;<br>average (mg/dL)               | 2.1 [1.8 – 2.2]       | 1.9 [1.8 – 2.1]        | 0.093        | 2.1 [1.8 – 2.6]        | 2 [1.8 – 2.1]         | 0.128        | 2.2 [2 – 2.3]          | 2.05 [1.8 – 2.1]      | 0.370        |
| Creatinine;<br>maximum (mg/dL)              | 0.62 [0.51 – 0.74]    | 0.46 [0.43 – 0.60]     | <b>0.009</b> | 0.58 [0.46 – 0.72]     | 0.59 [0.47 – 0.72]    | 0.148        | 0.59 [0.42 – 1.85]     | 0.59 [0.47 – 0.72]    | 0.053        |
| AST; maximum<br>(IU/L)                      | <b>53 [30 – 102]</b>  | <b>39 [28 – 48]</b>    | <b>0.009</b> | <b>91 [33 – 138]</b>   | <b>44 [30 – 63]</b>   | 0.509        | <b>72 [54 – 126]</b>   | <b>45 [30 – 74]</b>   | 0.698        |
| ALT; maximum<br>(IU/L)                      | <b>46 [21 – 112]</b>  | 26 [21 – 77]           | 0.170        | <b>81 [24 – 119]</b>   | 31 [20 – 104]         | 0.777        | <b>76 [35 – 112]</b>   | <b>34 [20 – 105]</b>  | 0.637        |
| Total Bilirubin;<br>maximum (mg/dL)         | 0.4 [0.3 – 0.6]       | 0.3 [0.2 – 0.4]        | 0.113        | 0.9 [0.3 – 1.2]        | 0.3 [0.3 – 0.5]       | 0.238        | 0.6 [0.3 – 1.3]        | 0.3 [0.3 – 0.5]       | 0.180        |
| Conjugated<br>Bilirubin, maximum<br>(mg/dL) | 0.2 [0.1 – 0.3]       | 0.1 [0.1 – 0.2]        | 0.186        | 0.2 [0.1 – 0.3]        | 0.2 [0.1 – 0.2]       | 0.332        | 0.2 [0.1 – 0.3]        | 0.2 [0.1 – 0.3]       | 0.504        |
| Albumin;<br>minimum (mg/dL)                 | <b>30 [28 – 36]</b>   | <b>36 [35 – 40]</b>    | 0.113        | <b>29 [28 – 32]</b>    | 37 [35 – 42]          | <b>0.008</b> | <b>30 [28 – 32]</b>    | <b>36 [29 – 38]</b>   | 0.180        |
| Triglycerides;<br>average (mg/dL)           | 125 [75 – 288]        | 124 [70 – 190]         | 0.399        | <b>176 [75 – 345]</b>  | 115 [61 – 206]        | 0.149        | <b>240 [201 – 381]</b> | 113 [71 – 220]        | <b>0.001</b> |
| Total cholesterol;<br>average (mg/dL)       | 131 [91 – 164]        | 95 [77 – 140]          | 0.223        | 132 [92 – 166]         | 123 [86 – 156]        | 0.854        | 150 [123 – 183]        | 123 [87 – 149]        | 0.299        |
| HDL cholesterol;<br>average (mg/dL)         | <b>26 [23 – 31]</b>   | <b>27 [16 – 34]</b>    | 0.938        | <b>23 [17 – 25]</b>    | <b>29 [25 – 38]</b>   | <b>0.012</b> | <b>22 [17 – 29]</b>    | <b>26 [23 – 33]</b>   | 0.566        |

|                                      |               |               |              |                     |              |       |                     |              |       |
|--------------------------------------|---------------|---------------|--------------|---------------------|--------------|-------|---------------------|--------------|-------|
| LDL cholesterol;<br>average (mg/dL)  | 86 [64 – 101] | 56 [44 – 120] | 0.252        | 89 [65 – 105]       | 77 [52 – 95] | 0.718 | 105 [90 – 132]      | 81 [56 – 91] | 0.115 |
| VLDL cholesterol;<br>average (mg/dL) | 23 [15 – 47]  | 15 [14 – 20]  | <b>0.009</b> | <b>25 [15 – 55]</b> | 19 [12 – 38] | 0.585 | <b>30 [28 – 52]</b> | 19 [14 – 35] | 0.478 |

*NIV : non-invasive ventilation, CMV : conventional mechanical ventilation, CRP : C-reactive protein, PCT : procalcitonin, LDH : lactate dehydrogenase, IL-6 : interleukin-6, PT : prothrombin time, aPTT : activated partial thromboplastin time, INR : international normalized ratio, NT-ProBNP: N-terminal pro brain natriuretic peptide, CK : creatin kinase, AST : aspartate aminotransferase, ALT : alanine aminotransferase, HDL cholesterol : high-density lipoprotein cholesterol, LDL cholesterol : low-density lipoprotein cholesterol, VLDL cholesterol : very low-density lipoprotein cholesterol.*

**Table S2: Evaluation of potential risk factors associated with greater severity: admission to the PICU, need for NIV and need for CMV.** The results are expressed as counts and percentages (in parenthesis).

| Risk factor                 | Patients ADMITTED to the PICU (n=13) | Patients NOT admitted to the PICU (n=31) | Odds Ratio [95% CI]       | p-value      | Patients who required NIV (n=11) | Patients who DID NOT required NIV (n=33) | Odds Ratio [95% CI]       | p-value      | Patients who required CMV (n=4) | Patients who DID NOT required CMV (n=40) | Odds Ratio [95% CI]   | p-value      |
|-----------------------------|--------------------------------------|------------------------------------------|---------------------------|--------------|----------------------------------|------------------------------------------|---------------------------|--------------|---------------------------------|------------------------------------------|-----------------------|--------------|
| Gender (males)              | 9 (69.2%)                            | 17 (54.8%)                               | 0.54 [0.13 – 2.13]        | 0.376        | 7 (63.6%)                        | 19 (57.6%)                               | 0.77 [0.18 – 3.17]        | 1            | 3 (75%)                         | 23 (57.5%)                               | 0.45 [0.04 – 4.72]    | 0.634        |
| Gender (females)            | 4 (30.8%)                            | 14 (45.2%)                               |                           |              | 4 (36.4%)                        | 14 (42.4%)                               |                           |              | 1 (25%)                         | 17 (42.5%)                               |                       |              |
| Age (<12 years old)         | 6 (46.2%)                            | 10 (32.3%)                               | 0.55 [0.14 – 2.09]        | 0.496        | 5 (45.5%)                        | 11 (33.3%)                               | 0.6 [0.14 – 2.4]          | 0.492        | 3 (75%)                         | 13 (32.5%)                               | 0.16 [0.01 – 1.69]    | 0.129        |
| Age (≥12 years old)         | 7 (53.8%)                            | 21 (67.7%)                               |                           |              | 6 (54.5%)                        | 22 (66.7%)                               |                           |              | 1 (25%)                         | 27 (67.5%)                               |                       |              |
| Presence of comorbidities   | 11 (84.6%)                           | 25 (80.6%)                               | 1.32 [0.22 – 7.59]        | 1            | 9 (81.8%)                        | 27 (81.8%)                               | 1 [0.17 – 5.86]           | 1            | 4 (100%)                        | 32 (80%)                                 |                       | 1            |
| Obesity / Overweight        | 3 (23.1%)                            | 10 (32.3%)                               | 0.63 [0.14 – 2.8]         | 0.722        | 2 (18.2%)                        | 11 (33.3%)                               | 0.44 [0.08 – 2.4]         | 0.461        | 0                               | 13 (32.5%)                               |                       |              |
| Recurrent wheezing / Asthma | 1 (7.7%)                             | 12 (38.7%)                               | 0.13 [0.01 – 1.14]        | 0.068        | 1 (9.1%)                         | 12 (36.4%)                               | 0.17 [0.02 – 1.54]        | 0.132        | 0                               | 13 (32.5%)                               |                       |              |
| Other pulmonary disease     | 4 (30.8%)                            | 6 (19.4%)                                | 1.85 [0.42 – 8.11]        | 0.449        | 4 (36.4%)                        | 6 (18.2%)                                | 2.57 [0.56 – 11.6]        | 0.237        | 2 (50%)                         | 8 (20%)                                  | 4 [0.48 – 32.9]       | 0.218        |
| Other neurological disorder | 2 (15.4%)                            | 7 (22.6%)                                | 0.62 [0.11 – 3.5]         | 0.703        | 1 (9.1%)                         | 8 (24.2%)                                | 0.31 [0.03 – 2.83]        | 0.411        | 0                               | 9 (22.5%)                                |                       |              |
| Prematurity ≤ 34 GA         | 4 (30.8%)                            | 1 (3.2%)                                 | <b>13.3 [1.3 – 134.9]</b> | <b>0.022</b> | 4 (36.4%)                        | 1 (3%)                                   | <b>18.2 [1.7 – 189.6]</b> | <b>0.010</b> | 3 (75%)                         | 2 (5%)                                   | <b>57 [3.9 – 825]</b> | <b>0.003</b> |
| Neuromuscular disorder      | 3 (23.1%)                            | 1 (3.2%)                                 | 9 [0.83 – 96.6]           | 0.071        | 2 (18.2%)                        | 2 (6.1%)                                 | 3.4 [0.42 – 28]           | 0.256        | 0                               | 4 (10%)                                  |                       |              |
| Immunodeficiency            | 2 (15.4%)                            | 2 (6.5%)                                 | 2.6 [0.33 – 21.1]         | 0.570        | 1 (9.1%)                         | 3 (9.1%)                                 | 1 [0.93 – 10.7]           | 1            | 1 (25%)                         | 3 (7.5%)                                 | 4.1 [0.32 – 52.6]     | 0.327        |
| Nephropathy                 | 1 (7.7%)                             | 2 (6.5%)                                 | 1.2 [0.1 – 14.6]          | 1            | 0                                | 3 (9.1%)                                 |                           |              | 0                               | 3 (7.5%)                                 |                       |              |
| Down syndrome               | 1 (7.7%)                             | 2 (6.5%)                                 | 1.2 [0.1 – 14.6]          | 1            | 1 (9.1%)                         | 2 (6.1%)                                 | 1.55 [0.1 – 18.9]         | 1            | 1 (25%)                         | 2 (5%)                                   | 6.33 [0.43 – 91.7]    | 0.254        |
| Cerebral palsy              | 1 (7.7%)                             | 1 (3.2%)                                 | 2.5 [0.14 – 43.2]         | 0.508        | 1 (9.1%)                         | 1 (3%)                                   | 3.2 [0.18 – 55.9]         | 0.442        | 0                               | 2 (5%)                                   |                       |              |
| Cardiopathy                 | 1 (7.7%)                             | 1 (3.2%)                                 | 2.5 [0.14 – 43.2]         | 0.508        | 1 (9.1%)                         | 1 (3%)                                   | 3.2 [0.18 – 55.9]         | 0.442        | 0                               | 2 (5%)                                   |                       |              |

|                                     |           |            |                    |       |           |            |                    |       |           |            |                    |       |
|-------------------------------------|-----------|------------|--------------------|-------|-----------|------------|--------------------|-------|-----------|------------|--------------------|-------|
| Diabetes mellitus                   | 2 (15.4%) | 0          |                    |       | 1 (9.1%)  | 1 (3%)     | 3.2 [0.18 – 55.9]  | 0.442 | 1 (25%)   | 1 (2.5%)   | 13 [0.64 – 263.8]  | 0.175 |
| Other metabolic disorder            | 1 (7.7%)  | 1 (3.2%)   | 2.5 [0.14 – 43.2]  | 0.508 | 1 (9.1%)  | 1 (3%)     | 3.2 [0.18 – 55.9]  | 0.442 | 1 (25%)   | 1 (2.5%)   | 13 [0.64 – 263.8]  | 0.175 |
| Other diseases                      | 6 (46.2%) | 12 (38.7%) | 1.3 [0.36 – 5]     | 0.647 | 4 (36.4%) | 14 (42.4%) | 0.77 [0.18 – 3.17] | 1     | 1 (25%)   | 17 (42.5%) | 0.45 [0.43 – 4.7]  | 0.634 |
| Time until diagnosis ≤2 days (n=30) | 7 (23.3%) | 23 (76.6%) | 2.46 [0.63 – 9.55] | 0.288 | 5 (16.7%) | 25 (83.3%) | 3.7 [0.89 – 15.6]  | 0.132 | 2 (6.7%)  | 28 (93.3%) | 2.33 [0.29 – 18.5] | 0.581 |
| Time until diagnosis >2 days (n=14) | 6 (42.9%) | 8 (57.1%)  |                    |       | 6 (42.9%) | 8 (57.1%)  |                    |       | 2 (14.3%) | 12 (85.7%) |                    |       |
| Time until admission ≤6 days (n=25) | 10 (40%)  | 15 (60%)   | 0.28 [0.06 – 1.22] | 0.081 | 8 (32%)   | 17 (68%)   | 0.39 [0.09 – 1.77] | 0.301 | 4 (16%)   | 21 (84%)   |                    | 0.122 |
| Time until admission >6 days (n=19) | 3 (15.8%) | 16 (84.2%) |                    |       | 3 (15.8%) | 16 (84.2%) |                    |       | 0         | 0          |                    |       |
| Viral coinfection                   | 3 (23.1%) | 2 (6.4%)   | 3 [0.37 – 24.17]   | 0.347 | 3 (27.2%) | 2 (6.1%)   | 3 [0.37 – 24.17]   | 0.347 | 2 (50%)   | 3 (18.8%)  | 4.3 [0.4 – 44.4]   | 0.249 |
| Bacterial coinfection               | 3 (23.1%) | 1 (3.2%)   |                    | 1     | 3 (27.2%) | 1 (3%)     | 1 [0.4 – 24.5]     | 1     | 2 (50%)   | 2 (5%)     | 1 [0.63 – 15.9]    | 1     |

PICU : pediatric intensive care unit, NIV : non-invasive ventilation, CMV : conventional mechanical ventilation, GA : gestational age.

**Table S3: Differences of the patients regarding SARS-CoV-2 variant periods:** Wuhan period (March 2020-February 2021), Alpha period (B.1.1.7; February 2021-June 2021), Delta period (B.1.617.1; June 2021 - December 2021) and Omicron period (B.1.1.529; December 2021 - March 2022). The results are expressed as counts and percentages (in parenthesis).

| Variable                    | Wuhan period (n=14) | Alpha period (n=7) | Delta period (n=11) | Omicron period (n=12) | p-value      |
|-----------------------------|---------------------|--------------------|---------------------|-----------------------|--------------|
| Gender (males)              | 8 (57.1%)           | 5 (71.4%)          | 7 (63.6%)           | 6 (50%)               | 0.809        |
| Gender (females)            | 6 (42.9%)           | 2 (28.6%)          | 4 (36.4%)           | 6 (50%)               |              |
| Age (<12 years old)         | 3 (21.4%)           | 2 (28.6%)          | 1 (9.1%)            | 10 (83.3%)            | <b>0.001</b> |
| Age (≥12 years old)         | 11 (78.6%)          | 5 (71.4%)          | 10 (90.9%)          | 2 (16.7%)             |              |
| Presence of comorbidities   | 10 (71.4%)          | 7 (100%)           | 9 (81.8%)           | 10 (83.3%)            | 0.459        |
| Obesity / Overweight        | 6 (42.9%)           | 2 (28.6%)          | 4 (36.4%)           | 1 (8.3%)              | 0.258        |
| Recurrent wheezing / Asthma | 3 (21.4%)           | 1 (14.3%)          | 4 (36.4%)           | 5 (41.7%)             | 0.509        |
| Other pulmonary disease     | 3 (21.4%)           | 1 (14.3%)          | 2 (18.2%)           | 4 (33.3%)             | 0.754        |
| Other neurological disorder | 3 (21.4%)           | 3 (42.9%)          | 2 (18.2%)           | 1 (8.3%)              | 0.350        |
| Prematurity ≤ 34 GA         | 1 (7.1%)            | 0                  | 2 (18.2%)           | 2 (16.7%)             | 0.575        |
| Neuromuscular disorder      | 2 (14.3%)           | 1 (14.3%)          | 1 (9.1%)            | 0                     | 0.596        |
| Immunodeficiency            | 3 (21.4%)           | 1 (14.3%)          | 0                   | 0                     | 0.164        |
| Nephropathy                 | 1 (7.1%)            | 1 (14.3%)          | 0                   | 1 (8.3%)              | 0.690        |
| Down syndrome               | 0                   | 0                  | 2 (18.2%)           | 1 (8.3%)              | 0.282        |
| Cerebral palsy              | 0                   | 0                  | 1 (9.1%)            | 1 (8.3%)              | 0.589        |
| Cardiopathy                 | 0                   | 0                  | 0                   | 2 (16.7%)             | 0.134        |
| Diabetes mellitus           | 2 (14.3%)           | 0                  | 0                   | 0                     | 0.213        |
| Other metabolic disorder    | 0                   | 1 (14.3%)          | 1 (9.1%)            | 0                     | 0.349        |
| Other diseases              | 6 (42.9%)           | 6 (85.7%)          | 1 (9.1%)            | 5 (41.7%)             | <b>0.015</b> |
| Fever                       | 14 (100%)           | 6 (85.7%)          | 9 (81.8%)           | 11 (91.7%)            | 0.434        |
| Cough                       | 9 (64.3%)           | 4 (57.1%)          | 9 (81.8%)           | 12 (100%)             | 0.085        |
| Respiratory distress        | 10 (71.4%)          | 5 (71.4%)          | 10 (90.9%)          | 8 (66.7%)             | 0.558        |
| Rhinorrhea                  | 3 (21.4%)           | 2 (28.6%)          | 4 (36.4%)           | 10 (83.3%)            | <b>0.010</b> |
| General malaise             | 5 (35.7%)           | 3 (42.9%)          | 7 (63.6%)           | 4 (33.3%)             | 0.446        |
| Chest pain                  | 4 (28.6%)           | 3 (42.9%)          | 4 (36.4%)           | 2 (16.7%)             | 0.614        |
| Diarrhea                    | 7 (50%)             | 3 (42.9%)          | 1 (9.1%)            | 1 (8.3%)              | <b>0.037</b> |
| Headache                    | 5 (35.7%)           | 2 (28.6%)          | 3 (27.3%)           | 0                     | 0.162        |
| Nausea/Vomiting             | 2 (14.3%)           | 1 (14.3%)          | 0                   | 5 (41.7%)             | 0.069        |
| Odynophagia                 | 1 (7.1%)            | 0                  | 5 (45.5%)           | 1 (8.3%)              | <b>0.020</b> |

|                                    |            |           |            |            |              |
|------------------------------------|------------|-----------|------------|------------|--------------|
| Myalgia                            | 3 (21.4%)  | 1 (14.3%) | 2 (18.2%)  | 0          | 0.422        |
| Abdominal pain                     | 1 (7.1%)   | 1 (14.3%) | 0          | 0          | 0.416        |
| Anosmia / Ageusia                  | 1 (7.1%)   | 0         | 0          | 0          | 0.533        |
| CXR: Bilateral consolidation       | 6 (42.9%)  | 1 (14.3%) | 8 (72.7%)  | 3 (25%)    | <b>0.005</b> |
| CXR: Lobar consolidation           | 6 (42.9%)  | 2 (28.6%) | 2 (18.2%)  | 7 (58.3%)  |              |
| CXR: Ground-glass opacities        | 2 (14.3%)  | 1 (14.3%) | 1 (9.1%)   | 2 (16.7%)  |              |
| CXR: Interstitial opacities        | 0          | 3 (42.9%) | 0          | 0          |              |
| Total hospital stay ≤5 days (n=22) | 5 (22.7%)  | 4 (18.2%) | 7 (31.8%)  | 6 (27.3%)  | 0.551        |
| Total hospital stay >5 days (n=22) | 9 (40.9%)  | 3 (13.6%) | 4 (36.4%)  | 6 (27.3%)  |              |
| Admission to the PICU              | 4 (28.6%)  | 2 (28.6%) | 4 (36.4%)  | 3 (25%)    | 0.945        |
| Total PICU stay ≤5 days (n=9)      | 3 (33.3%)  | 2 (22.2%) | 3 (44.4%)  | 1 (11.1%)  | 0.419        |
| Total PICU stay >5 days (n=4)      | 1 (25%)    | 0         | 1 (25%)    | 2 (50%)    |              |
| Presenting complications           | 2 (14.3%)  | 1 (14.3%) | 1 (9.1%)   | 4 (33.3%)  | 0.761        |
| Need for respiratory support       | 11 (78.6%) | 6 (85.7%) | 10 (90.9%) | 10 (83.3%) | 0.868        |
| Need for NIV                       | 3 (21.4%)  | 1 (14.3%) | 4 (36.4%)  | 3 (25%)    | 0.734        |
| Need for CMV                       | 1 (7.1%)   | 0         | 1 (9.1%)   | 2 (16.7%)  | 0.660        |
| Treatment with steroids            | 8 (57.1%)  | 6 (85.7%) | 9 (81.8%)  | 6 (50%)    | 0.232        |
| Treatment with remdesivir          | 1 (7.1%)   | 1 (14.3%) | 2 (18.2%)  | 3 (25%)    | 0.659        |
| Treatment with immunomodulators    | 3 (21.4%)  | 0         | 1 (9.1%)   | 0          | 0.534        |

GA : gestational age, CXR : chest X-ray, PICU : pediatric intensive care unit, NIV : non-invasive ventilation, CMV : conventional mechanical ventilation.
